# Supplementary material for: Effective Dose of Rhizoma Coptidis Extract Granules for Type 2 Diabetes Treatment: A Hospital-Based Retrospective Cohort Study
Source: PubMed Central journal article supplement (PMC7868566; doi:10.3389/fphar.2020.597703), 2021-01-25
Supplement: datasheet3.pdf [file datasheet3.pdf]

**Supplementary File 3.** Commonly co-prescribed CHM extract granules for type 2 diabetes.

| CHM                                    | Dosage (gm/day)<br>Median (min.,<br>max.) | Effects                                                                                            | TCM indications                                                                                                                 | Number of patients (%)<br>(total n = 77) | Number of prescriptions (%)<br>(total n = 636) |
|----------------------------------------|-------------------------------------------|----------------------------------------------------------------------------------------------------|---------------------------------------------------------------------------------------------------------------------------------|------------------------------------------|------------------------------------------------|
| Huang-Lian<br>(RCEG)                   | 9.5 (4.5, 16.6)                           | Cool heat, drain fire,<br>clear damp-heat,<br>detoxify and disinfect                               | Febrile illnesses, heart fire,<br>stomach fire, jaundice,<br>dysenteric disorders, diarrhea,<br>infections in the middle burner | 77 (100.0)                               | 636 (100.0)                                    |
| Shen-Ling-Bai-<br>Zhu-San              | 7.3 (0.9, 12.0)                           | Tonify qi and fortify the<br>spleen, drain dampness<br>and harmonize the<br>stomach                | Spleen-stomach weakness, poor<br>appetite, and sloppy stool                                                                     | 73 (94.8)                                | 490 (77.0)                                     |
| San-Qi                                 | 1.5 (0.8, 3.0)                            | Restrain blood, stop<br>bleeding, break up<br>blood stagnation, break<br>up swelling, relieve pain | Bleeding, swelling,<br>haematomas,<br>contusion, traumatic injuries,<br>abdominal pain, joint pain                              | 28 (36.4)                                | 130 (20.4)                                     |
| LipoCol Forte<br>Capsules <sup>#</sup> | 2.0 (1.4, 2.0)                            | Promote digestion and<br>blood circulation, tonify<br>spleen and dry stomach                       | Hypercholesterolemia,<br>hypertriglycemia                                                                                       | 12 (15.6)                                | 87 (13.7)                                      |
| Ban-Xia-Xie-<br>Xin-Tang               | 3.0 (1.2, 4.5)                            | Harmonize the stomach<br>to downbear<br>counterflow                                                | Cold damage induced by early<br>purgation, stuffiness and<br>fullness below the heart,<br>vomiting and borborigmus              | 10 (13.0)                                | 62 (9.8)                                       |
| Bu-Yang-Huan-<br>Wu-Tang               | 4.4 (2.0, 6.0)                            | Tonify qi, active blood<br>to free the collateral<br>vessels                                       | Hemiplegia, deviated eye and<br>mouth, sluggish speech and<br>sequela of wind stroke                                            | 8 (10.4)                                 | 62 (9.8)                                       |

|                           |                |                                                                                      |                                                                                                                                                                       |           |          |
|---------------------------|----------------|--------------------------------------------------------------------------------------|-----------------------------------------------------------------------------------------------------------------------------------------------------------------------|-----------|----------|
| Gui-Lu-Er-Xian-Jiao*      | 5.3 (3.7, 9.0) | Tonify the essence-marrow, tonify qi and nourish spirit                              | Consumptive disease, lumbago, seminal emission, impotence, enuresis, infertility, hypoadrenocorticism, sexual dysfunction, degeneration arthritis, and osteoporosis   | 11 (14.3) | 57 (9.0) |
| Cang-Zhu                  | 2.3 (0.1, 9.0) | Dry dampness, tonify and regulate the qi, disperse wind-dampness                     | Nausea and vomiting, epigastric pain, leucorrhoea painful obstruction disorder of the joints and limbs                                                                | 14 (18.2) | 55 (8.6) |
| Xiang-Sha-Liu-Jun-Zi-Tang | 3.0 (1.0, 4.7) | Fortify the spleen and nourish the stomach                                           | Qi deficiency and phlegm-retained fluid, stuffiness and oppression in vomiting, abdominal distention                                                                  | 8 (10.4)  | 41 (6.4) |
| Xiao-Qing-Long-Tang       | 0.8 (0.5, 2.0) | Release the exterior to dissipate cold, warm the lung and resolve fluid retention    | Wind-cold induced by exopathogen, internal stagnation of fluid-dampness, aversion to cold with fever, absence of sweating, cough and panting, white and watery phlegm | 8 (10.4)  | 30 (4.7) |
| Dan-Shen                  | 1.3 (0.3, 1.5) | Move blood, break up blood stasis, cool heat, cool blood, calm and anchor the spirit | Stagnation, blood stasis, palpitations, insomnia, anxiety, restlessness, irritability                                                                                 | 6 (7.8)   | 28 (4.4) |

|                          |                |                                                                                                    |                                                                                                                                 |           |          |
|--------------------------|----------------|----------------------------------------------------------------------------------------------------|---------------------------------------------------------------------------------------------------------------------------------|-----------|----------|
| San-Zhong-Kui-Jian-Tang  | 5.5 (2.3, 6.0) | Clear heat and detoxicate, break accumulation and promote rupture                                  | Scrofula and subcutaneous node                                                                                                  | 8 (10.4)  | 26 (4.1) |
| Suan-Zao-Ren-Tang        | 3.0 (2.0, 3.7) | Nourish the blood and tranquilization, clear heat and relieve restlessness                         | Irritability, anxiety, night sweats, fidgeting, sleep disturbance                                                               | 5 (6.5)   | 22 (3.5) |
| Bai-Hu-Jia-Ren-Shen-Tang | 6.1 (3.0, 7.8) | Clear heat, replenish qi and harmonize the middle                                                  | Dual damage of fluid and qi, polydipsia, summer heat stroke, fever and thirst, sweating and aversion to cold                    | 5 (6.5)   | 22 (3.5) |
| He-Huan-Pi               | 3.0 (1.0, 3.0) | Calm and anchor the spirit, tonify blood, move the qi, spread liver qi                             | Insomnia, irritability, nervousness, agitation, anxiety, fear, insomnia, depression                                             | 11 (14.3) | 20 (3.1) |
| Ye-Jiao-Teng             | 2.8 (1.5, 3.0) | Tonify blood, relieve pain, calm and anchor the spirit, unblock the channels and open the orifices | Agitation, irritability, insomnia, restlessness, numbness, pain in the limbs, paraesthesias, blood deficiency, liver deficiency | 10 (13.0) | 17 (2.7) |
| Jia-Wei-Xiao-Yao-San     | 2.0 (1.0, 2.0) | Soothe the liver and release depression, clear heat to cool the blood                              | Liver depression, blood deficiency and fever, menstrual irregularities, disquieted fearful throbbing                            | 4 (5.2)   | 14 (2.2) |
| Yin-Chen                 | 1.0 (0.9, 1.5) | Clear damp-heat, cool                                                                              | Jaundice, constipation,                                                                                                         | 4 (5.2)   | 13 (2.0) |

|                       |                |                                                                       |                                                                                                                                                                  |         |          |
|-----------------------|----------------|-----------------------------------------------------------------------|------------------------------------------------------------------------------------------------------------------------------------------------------------------|---------|----------|
|                       |                | heat                                                                  | hepatitis, cholelithiasis, cholecystitis, intermittent fever, loss of appetite, bitter taste in the mouth                                                        |         |          |
| Ma-Xing-Gan-Shi-Tang  | 4.6 (1.9, 9.0) | Diffusion with pungent-cool, clear the lung to calm panting           | Pathogenic heat congesting the lung, fever, cough and panting                                                                                                    | 4 (5.2) | 13 (2.0) |
| Gan-Jiang             | 0.6 (0.3, 0.9) | Warm the yang, disperse cold, dispel damp-cold, transform cold phlegm | Interior cold, especially cold in the spleen (vomiting, diarrhea, nausea, feeling of cold) and lung (cough, thin white sputum)                                   | 6 (7.8) | 9 (1.4)  |
| Ling-Gui-Zhu-Gan-Tang | 3.0 (1.0, 6.0) | Fortify the spleen and drain dampness, warm and resolve phlegm        | Phlegm-retained fluid disease, fullness and distention in the chest and hypochondrium, dizziness and palpitations, shortness of breath and cough                 | 5 (6.5) | 9 (1.4)  |
| Yi-Gan-Sang           | 2.0 (2.0, 6.0) | Clear liver heat                                                      | Dampness-heat in the liver meridian, fright palpitations and convulsions, vomiting and phlegm drool, distention and fullness in abdomen, poor appetite, insomnia | 4 (5.2) | 6 (0.9)  |
| Cang-Er-San           | 3.0 (2.0, 3.0) | Disperse wind to clear heat                                           | Sinusitis (persistent excessive flow of turbid nasal discharge)                                                                                                  | 4 (5.2) | 4 (0.6)  |

CHM, Chinese herbal medicines; RCEG, *Rhizoma Coptidis* extract granules

# Each LipoCol Forte Capsules contains 0.6 gram of red yeast rice.

\* Formulation of Gui-lu-er-xian-jiao was prescribed as a pill weighted 0.5 gram per piece.
